# Supplementary material for: Influenza A/H3N2 virus infection in immunocompromised ferrets and emergence of antiviral resistance
Source: PubMed Central journal article supplement (PMC6053203; doi:10.1371/journal.pone.0200849), 2018-07-19
Supplement: pone.0200849.s003.pdf [file pone.0200849.s003.pdf]

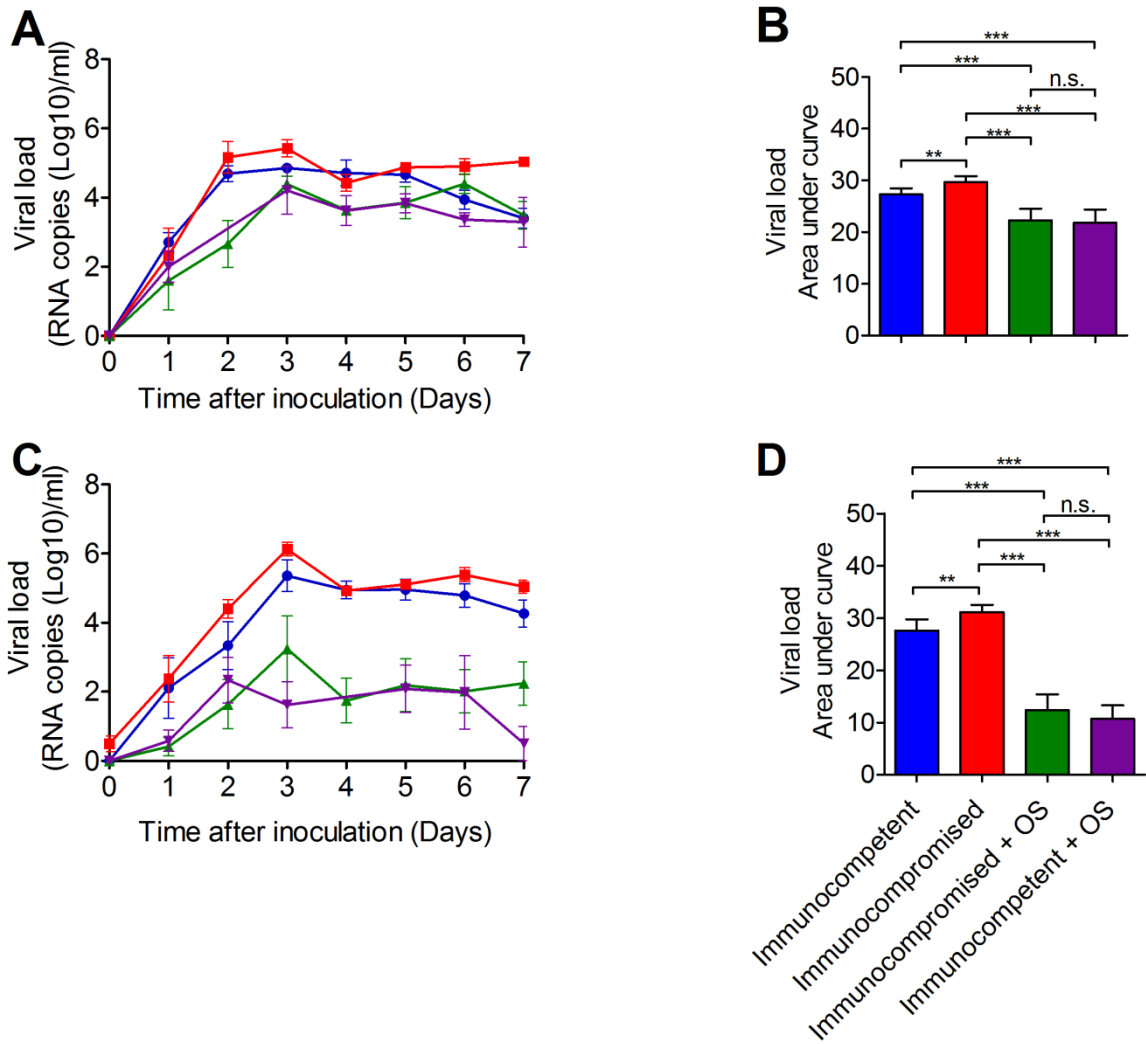

**S2 Fig. Viral RNA load in ferrets inoculated with influenza virus A/NL/16/98.**

Immunocompetent (blue, purple) and immunocompromised (red, green) ferrets were inoculated with influenza virus A/NL/16/98 (H3N2) and subsequently treated with oseltamivir (green, purple) or left untreated (blue, red). Virus RNA load in samples of the throat (A) and nose (C) was determined by qRT-PCR daily for 7 days. The area under the curve of panels A and C was used to estimate the total amount of viral RNA shedding from the throat (B) and nose (D) of the inoculated ferrets. The line and bar graphs depict the mean  $\pm$  S.E.M. The asterisks indicates a statistically significant P value ( $0.01 < **P < 0.001$ ,  $***P < 0.001$ ).
