# Supplementary material for: Influenza A/H3N2 virus infection in immunocompromised ferrets and emergence of antiviral resistance
Source: PubMed Central journal article supplement (PMC6053203; doi:10.1371/journal.pone.0200849), 2018-07-19
Supplement: pone.0200849.s005.pdf [file pone.0200849.s005.pdf]

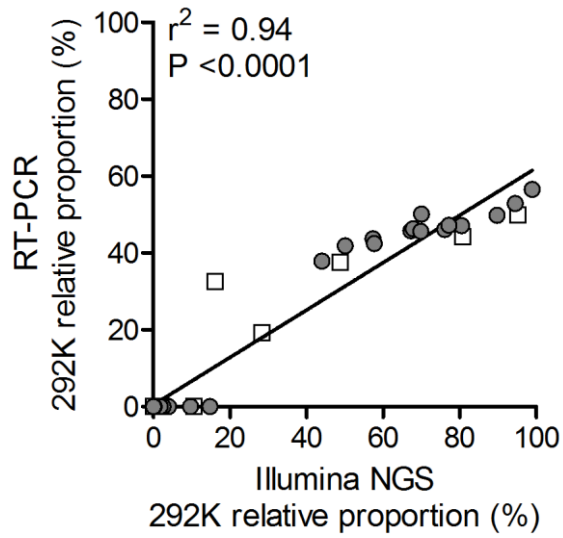

**S4 Fig. Correspondence between the R292K resistance mutation as measured by mutation specific RT-PCR and Illumina next generation sequencing.**

The relative proportion of the R292K resistance mutation detected in samples of all oseltamivir treated immunocompromised (grey circles) and immunocompetent (open squares) ferrets inoculated with A/NL/16/98 (H3N2) as determined by mutation specific RT-PCR was compared to the relative proportion determined by Illumina NGS.
