# Supplementary material for: Influenza A/H3N2 virus infection in immunocompromised ferrets and emergence of antiviral resistance
Source: PubMed Central journal article supplement (PMC6053203; doi:10.1371/journal.pone.0200849), 2018-07-19
Supplement: pone.0200849.s007.pdf [file pone.0200849.s007.pdf]

**S1 Table: Amino acid substitution in hemagglutinin and neuraminidase sequences of OS treated immunocompetent ferrets by Illumina next generation sequencing.**

| <b>Ferret</b> | <b>Day<sup>a</sup></b> | <b>R292K (%)</b> | <b>AA<sup>b</sup> change in HA<sup>b</sup> (%)</b>                       | <b>AA change in NA<sup>b</sup> (%)</b> |
|---------------|------------------------|------------------|--------------------------------------------------------------------------|----------------------------------------|
| <b>1</b>      | 2                      | 0                | D204G(5.0), E442G(1.4),<br>G442D(1.1)                                    |                                        |
|               | 4                      | 0                |                                                                          |                                        |
|               | 6                      | 27.1             |                                                                          |                                        |
| <b>2</b>      | 2                      | 0                | K18R(5.0), Q49R(1.3),<br>S61N(1.3), T64I(1.3), G65D(1.3),<br>C493TY(2.6) | I464L(1.9)                             |
|               | 4                      | 0                |                                                                          |                                        |
|               | 6                      | 2.2              |                                                                          | L81P(1.5), T325I(2.2)                  |
| <b>3</b>      | 2                      | 0                | R2470W(1.3), E473G(1.2),<br>F483S(1.0), D503G(1.4)                       | S367G(1.0)                             |
|               | 4                      | 15.9             | E442G(5.3), A475T(2.7),<br>E476Q(2.7), L543F(7.7)                        | F22S(21.4), V360M(5.2)                 |
|               | 6                      | 78.5             |                                                                          | V360M(0.8)                             |
| <b>4</b>      | 2                      | 0                |                                                                          |                                        |
|               | 4                      | 0                | N97D(8.8), N338I(1.0),<br>G358S(1.6), Q372L(1.4),<br>E522G(2.0)          | K75N(2.6), D113E(2.2)                  |
|               | 6                      | 48               | Y318F(1.1)                                                               |                                        |
| <b>5</b>      | 2                      | 0                |                                                                          |                                        |
|               | 4                      | 0                | I377R(1.3)                                                               | S245G(4.8), I464L(1.8)                 |
|               | 6                      | 92.0             |                                                                          |                                        |
| <b>6</b>      | 2                      | 0                |                                                                          |                                        |
|               | 4                      | 0                | A122V(1.0), E442G(2.8),<br>Y502H(1.3), D503Y(1.3)                        |                                        |
|               | 6                      | 17.5             | A269T(3.7), I355R(4.4),<br>E510G(2.0)                                    | G137E(3.3), R210G(2.8),<br>Y453C(1.2)  |

<sup>a</sup> Time post infection when resistance mutations is detected.

<sup>b</sup> Abbreviation: AA, amino acid; HA, hemagglutinin; NA, neuraminidase.
